# Supplementary material for: Enhancing the electrical performance of InAs nanowire field-effect transistors by improving the surface and interface properties by coating with thermally oxidized Y2O3
Source: Royal Society of Chemistry journal article supplement (doi:10.1039/d2nr02736d), 2022-01-01
Supplement: d2nr02736d1.pdf [file d2nr02736d1.pdf]

## Supporting Information

### Enhancing the Electrical Performance of InAs Nanowire Field-Effect Transistors through Improving Surface and Interface Properties by Coating Thermal-Oxidized Y<sub>2</sub>O<sub>3</sub>

Yifan Jiang,<sup>1</sup> Rui Shen,<sup>1</sup> Tong Li,<sup>1,2</sup> Jiamin Tian,<sup>1</sup> Shuo Li,<sup>1</sup> Hark Hoe Tan,<sup>2</sup> Chennupati Jagadish,<sup>2</sup> Qing Chen<sup>1,\*</sup>

<sup>1</sup>*Key Laboratory for the Physic and Chemistry of Nanodevices, School of Electronics, Peking University, Beijing 100871, China.*

<sup>2</sup>*Department of Electronic Materials Engineering, ARC Centre of Excellence for Transformative Meta-Optical Systems, Research School of Physics, The Australian National University, Canberra, ACT 2601, Australia.*

*Email: [qingchen@pku.edu.cn](mailto:qingchen@pku.edu.cn).*

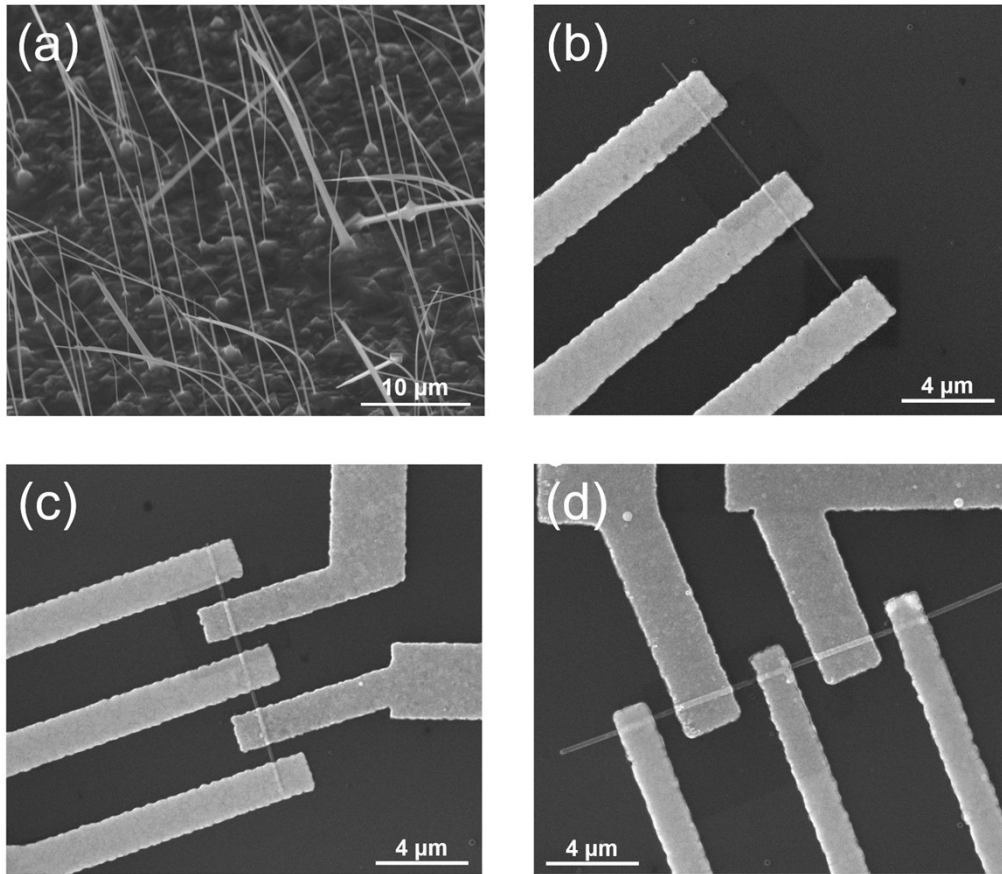

Figure S1. Scanning electron microscopy (SEM) images of InAs nanowires (NWs). (a) InAs NW array on the substrate. (b), (c), (d) Three pairs of InAs NW FETs, each based on the same individual InAs NW.

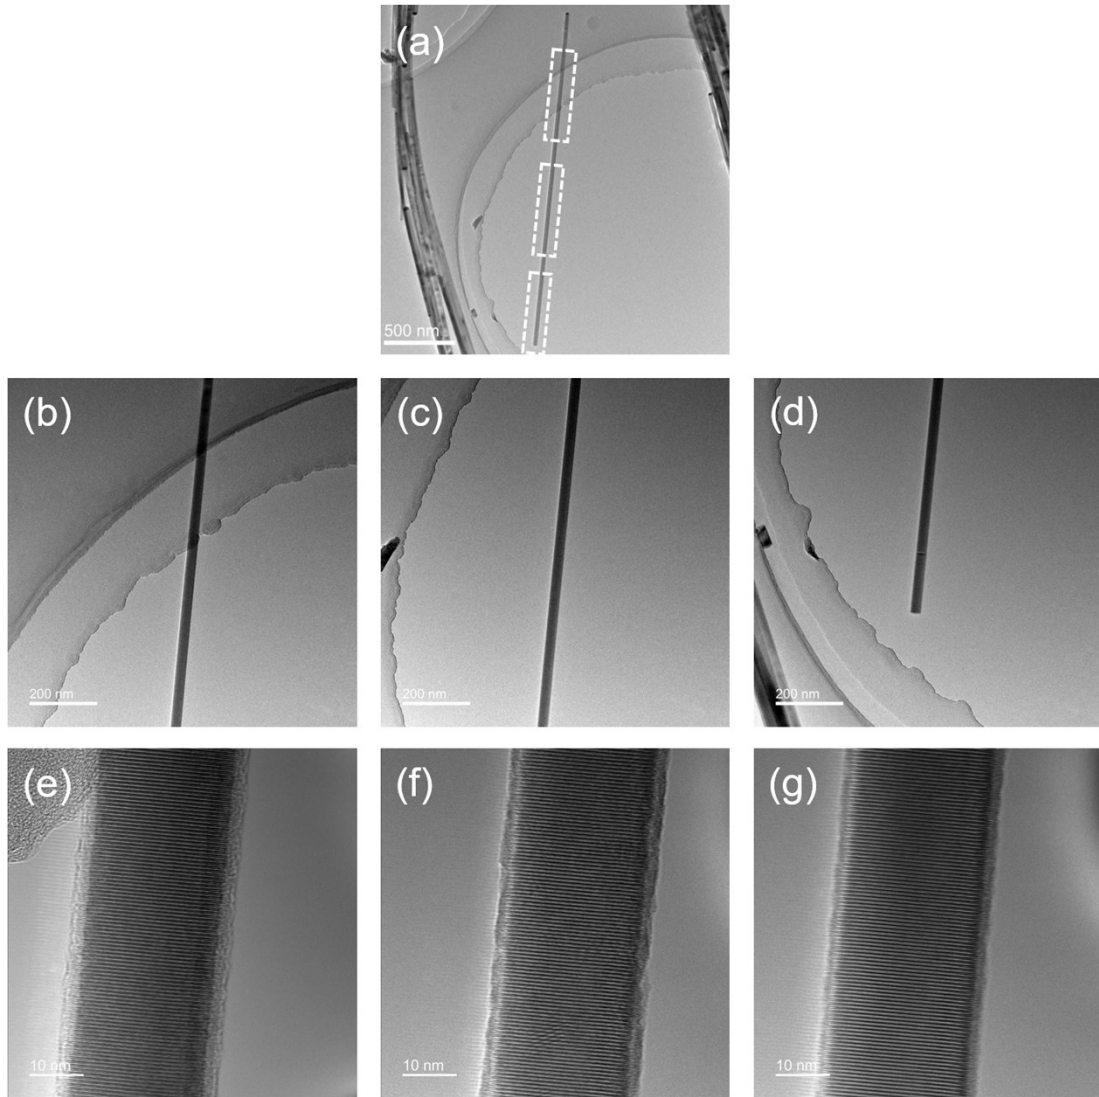

Figure S2. Transmission electron microscopy (TEM) images of a typical InAs NW. (a) Low-magnification TEM image of the InAs NW. (b)-(d) TEM images of different sections of this NW, outlined by the three dashed squares from top to bottom in (a), respectively. (e)-(g) High-resolution TEM images of the three sections in (b)-(d), respectively.

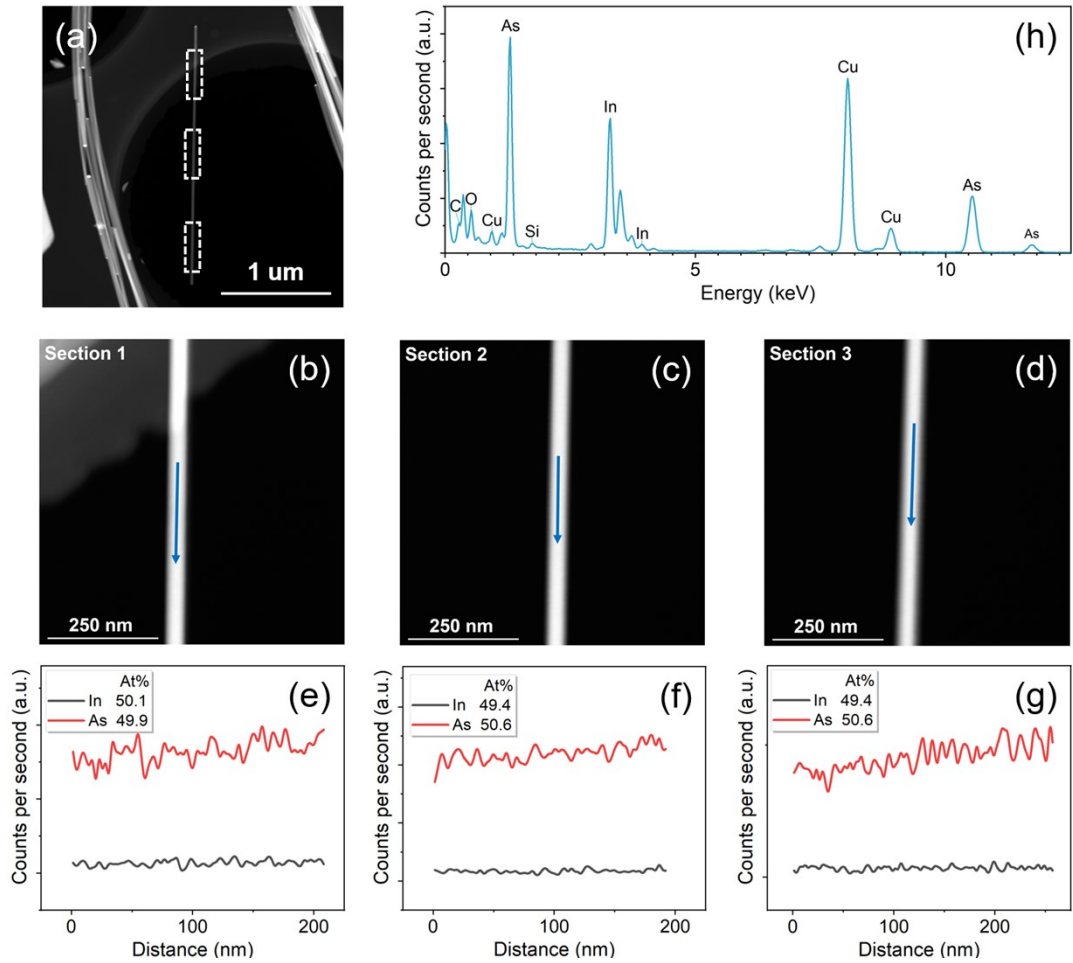

Figure S3. Scanning transmission electron microscopy (STEM) images and energy dispersive X-ray spectroscopy (EDS) analysis results of a typical InAs NW. This NW is the same one as shown in Figure S2. (a) Low-magnification STEM image of the NW. (b)-(d) STEM images of different sections of this NW, outlined by the three dashed squares in (a) from top to bottom, respectively. (e)-(g) EDS line scan results along the arrow direction in (b)-(d), respectively, showing the In/As ratio is uniform. (h) EDS spectrum of the InAs NW section in (c). The result shows that there are In and As, and O in the oxide layer besides Cu from the grid, C from the holy carbon film and small amount of Si from the detector.

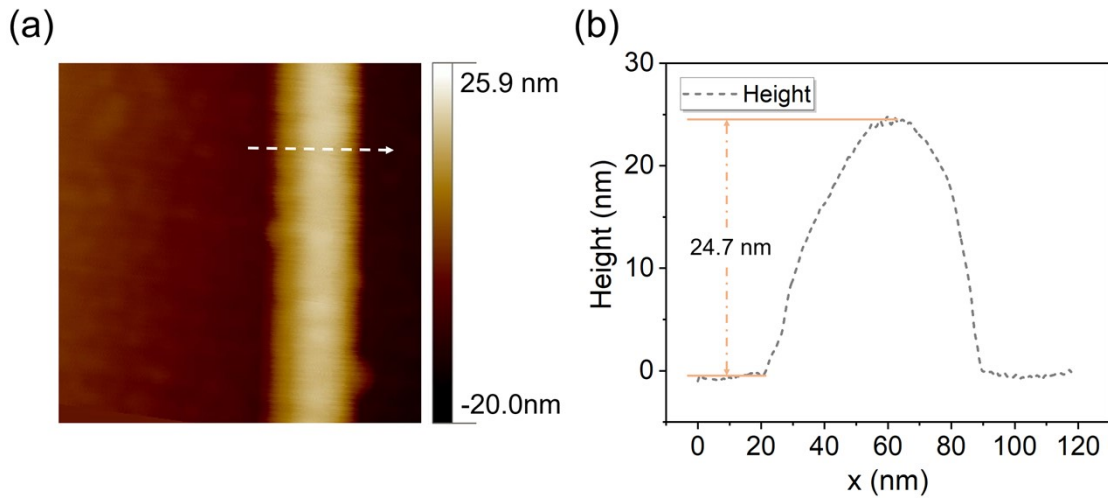

Figure S4. Atomic force microscopy (AFM) image of the NW in a baseline BGFET. The line profile in (b) is along the white dashed line in (a) showing the diameter of the NW is 24.7 nm.

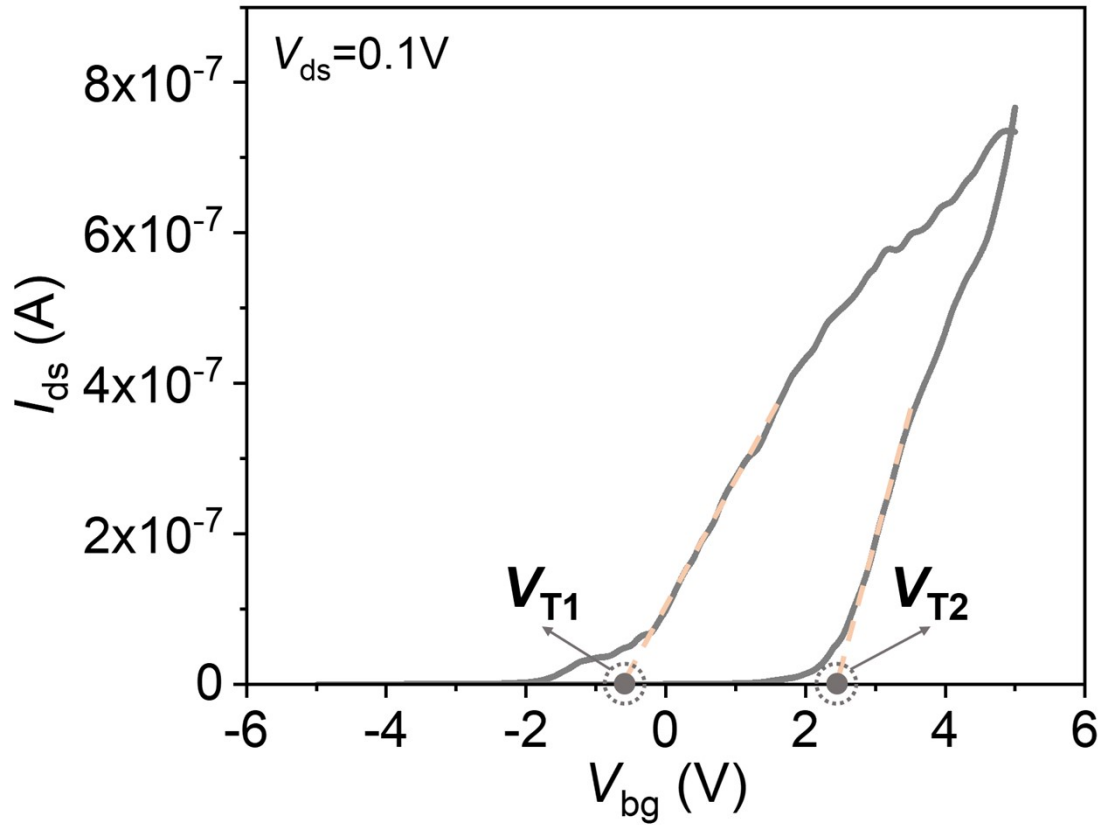

Figure S5. Method of defining the hysteresis of FET. The continuous line is the measured transfer curve in line scale. The dashed lines show the extension of the linear part of both the forward and backward transfer curves to intersect with the horizontal axis. The hysteresis of the FET can be defined by the difference of the two intersection points,  $V_{T1}$  and  $V_{T2}$ .

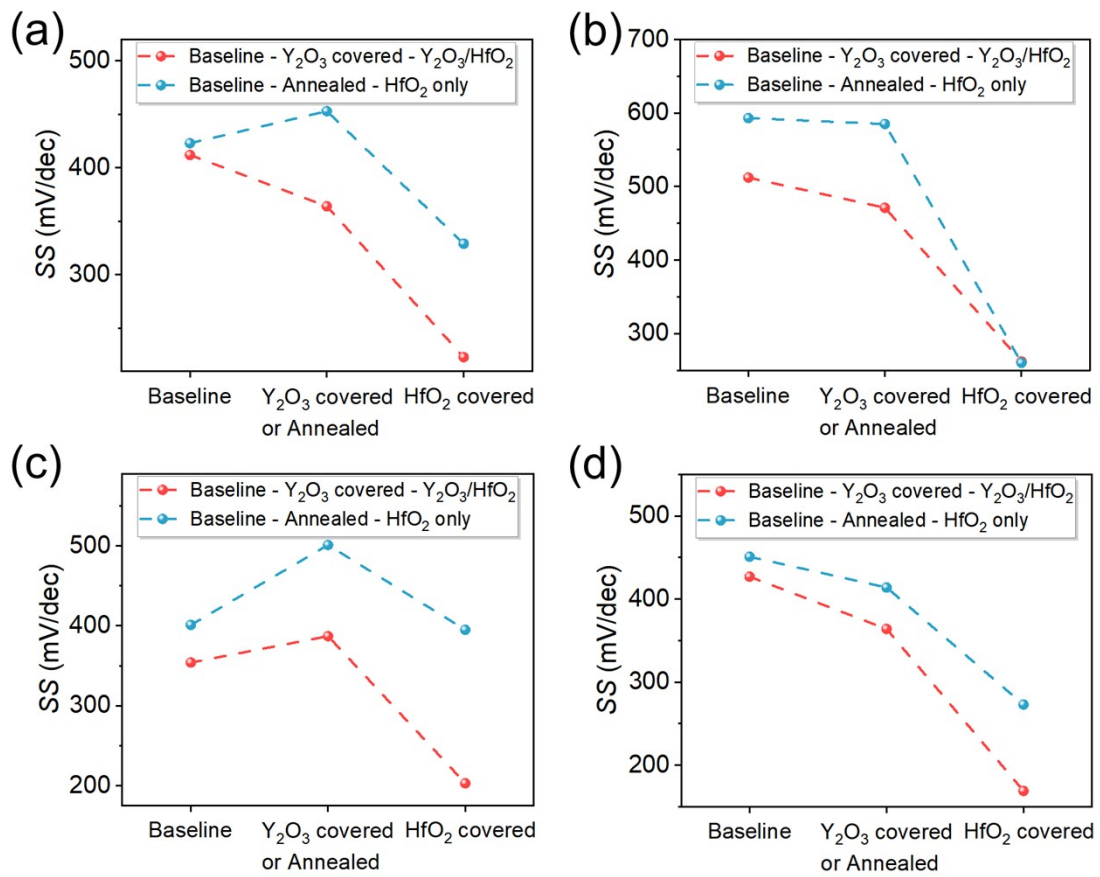

Figure S6. SS of other four pairs of BGFETs.

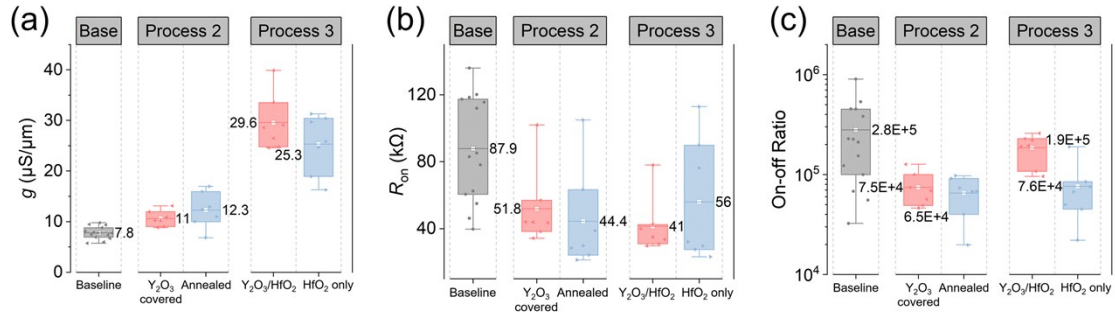

Figure S7. Statistic data of other electrical properties of paired BGFETs. (a) Transconductance,  $g$ . (b) On-state resistance,  $R_{\text{on}}$ . (c) On-off ratio.

As shown in Fig. S7(a), the transconductance of the device increased by the thermal annealing process is further improved after HfO<sub>2</sub> coating. The transconductance of the Y<sub>2</sub>O<sub>3</sub>/HfO<sub>2</sub>-covered BGFETs is larger than that of the HfO<sub>2</sub>-covered BGFETs. Fig. S7(b) shows the comparison of  $R_{\text{on}}$ . Due to different diameters of the NWs, there is a large spread in the value of  $R_{\text{on}}$  of baseline BGFETs, whereas the dispersion of  $R_{\text{on}}$  for Y<sub>2</sub>O<sub>3</sub>-covered BGFETs and annealed BGFETs decreases after annealing. After HfO<sub>2</sub> coating,  $R_{\text{on}}$  of Y<sub>2</sub>O<sub>3</sub>/HfO<sub>2</sub>-covered devices decreases further, while the average value and dispersion of  $R_{\text{on}}$  of the HfO<sub>2</sub>-covered BGFETs increase. Fig S7(c) shows the on-off ratio of the BGFETs. The diameters of the NWs used here are in the range of 18-33 nm, and the baseline BGFETs have an on-off ratio of more than five orders of magnitude, with a maximum of  $9.03 \times 10^5$ . The thermal annealing process reduces the dispersion of the on-off ratio, but increases  $I_{\text{off}}$  slightly, leading to a lower on-off ratio (but still greater than  $10^4$ ). After HfO<sub>2</sub> coverage, the electrostatic environment of the channel is improved, thus the average on-off ratio of Y<sub>2</sub>O<sub>3</sub>/HfO<sub>2</sub>-covered devices is significantly increased to  $1.9 \times 10^5$ .

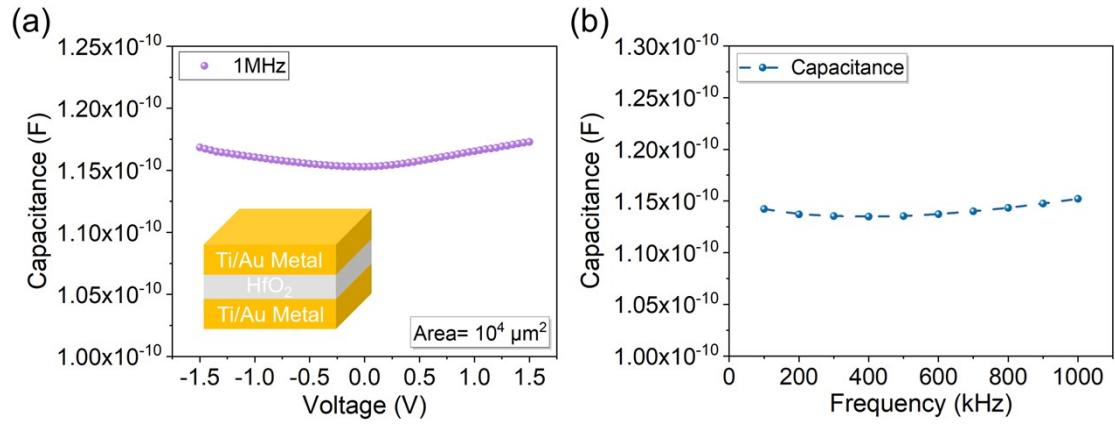

Figure S8. Capacitance test of the Ti/Au-HfO<sub>2</sub>-Ti/Au capacitor. (a) Capacitance-voltage ( $C$ - $V$ ) curve. (b) Capacitance-frequency ( $C$ - $F$ ) curve.

$$C_{HfO_2} = A \cdot \frac{\epsilon_0 \epsilon_r HfO_2}{t_{oxHfO_2}} \#(1)$$

where  $\epsilon_0 = 8.85 \times 10^{12} \text{ F/m}$ ,  $t_{ox} = 5 \text{ nm}$ . “A” represents the capacitor area (equals to  $10^4 \mu\text{m}^2$ ).  $\epsilon_r HfO_2$  is calculated to be 13.1 by the equation above. As shown in Fig. S8(b), the capacitance value is basically unchanged from 100 kHz to 1 MHz.



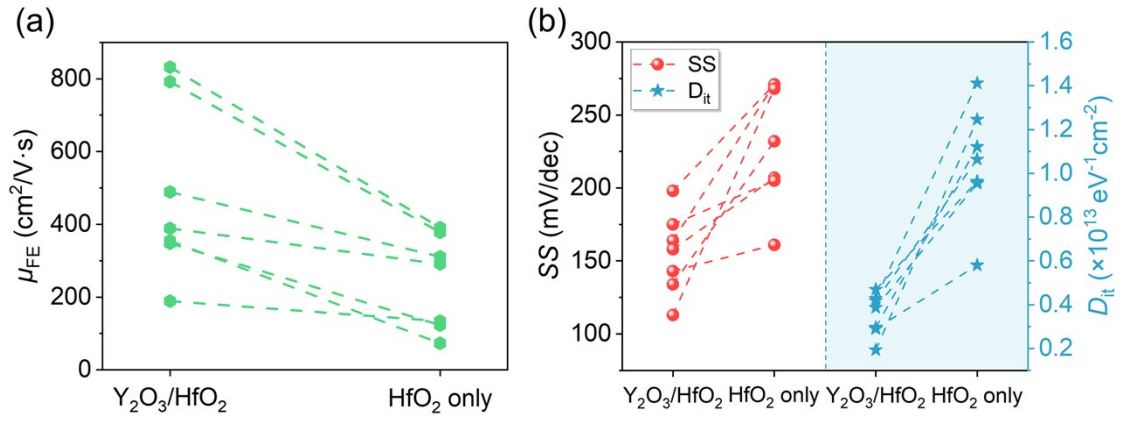

Figure S9. Comparison of (a)  $\mu_{FE}$ , (b) SS and  $D_{it}$  of seven pairs of TGFETs.

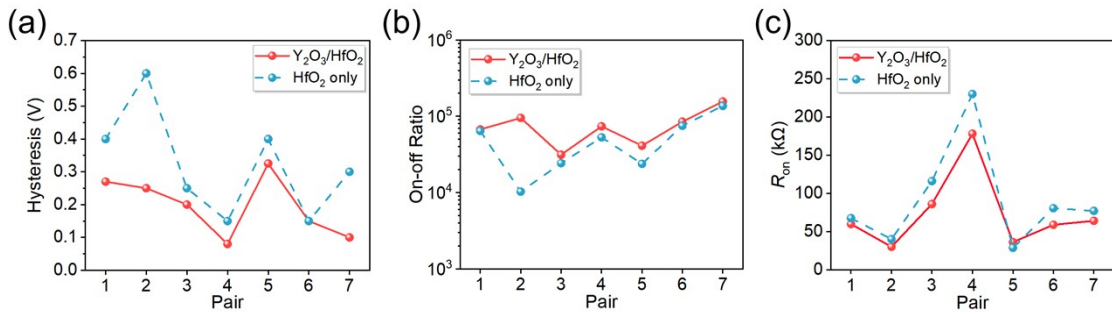

Figure S10. Comparison of electrical properties of pairs of  $\text{Y}_2\text{O}_3/\text{HfO}_2$ -covered and  $\text{HfO}_2$ -covered TGFETs. (a) Hysteresis, (b) On-off ratio, and (c)  $R_{on}$ .
